# Supplementary material for: Association between genetic polymorphisms of the IL28B gene and leukomonocyte in Chinese hepatitis B virus-infected individuals
Source: PeerJ. 2017 Dec 19;5:e4149. doi: 10.7717/peerj.4149 (PMC5740955; doi:10.7717/peerj.4149)
Supplement: Supplemental Information 2 [file peerj-05-4149-s002.xlsx]

## Sheet: Sheet1
Supplementary table 2. Information of HBV-infected persons
Sample No.	gender	viral load	HBsAg	HBsAb	HBeAg	HBeAb	HBcAb	HCV	HIVAb	TPAb	rs12979860	rs8099917	12980275
566	male		+	-	-	-	+	-	-	-	C C	T T	A A
542	female		-	+	-	+	+	-	-	-	C C	T T	A A
1947	male		+	-	-	-	+	-	-	-	C C	T T	A A
1241	male		-	+	-	-	+	-	-	-	C C	T T	A A
663	male		+	-	+	-	+	-	-	-	C C	T T	A A
787	male		+	-	-	-	+	-	-	-	C C	T T	A A
1046	male		+	-	-	+	+	-	-	-	C C	T T	A A
1883	female		-	+	-	+	+	-	-	-	C C	T T	A A
1146	female		+	+	-	-	+	-	-	-	C C	T T	A A
1852	male		+	-	-	+	+	-	-	-	C T	T T	A G
1773	male		-	+	-	-	+	-	-	-	C C	T T	A A
1373	female		-	+	-	-	+	-	-	-	C C	T T	A A
1803	male		+	-	-	+	+	-	-	-	C C	T T	A A
615	female		-	+	-	+	+	-	-	-	C C	T T	A A
1732	female		-	+	-	-	+	-	-	-	C C	T T	A A
1100	female		-	+	-	+	+	-	-	-	C C	T T	A A
1650	male		-	+	-	+	+	-	-	-	C C	T T	A A
1550	male		-	-	-	+	+	-	-	-	C C	T T	A A
1433	male		+	-	-	-	+	-	-	-	C C	T T	A A
1363	male		+	-	-	-	+	-	-	-	C C	T T	A A
1277	male		+	-	-	+	+	-	-	-	C C	T T	A A
1405	male		-	+	-	+	+	-	-	-	C C	T T	A A
1339	male		+	-	-	+	+	-	-	-	C C	T T	A A
1807	female		+	-	-	+	-	-	-	-	C C	T T	A A
1496	male		+	-	-	+	+	-	-	-	C C	T T	A A
862	female		-	+	-	-	+	-	-	-	C C	T T	A A
485	female		+	-	-	-	+	-	-	-	C C	T T	A A
744	male		-	+	-	+	+	-	-	-	C C	T T	A A
1404	male		+	-	-	+	+	-	-	-	C C	T T	A A
1495	male		+	-	-	+	+	-	-	-	C C	T T	A A
1521	male		+	-	-	+	+	-	-	-	C C	T T	A A
503	male		-	+	-	+	+	-	-	-	C C	T T	A A
1519	male		+	-	-	+	+	-	-	-	C C	T T	A A
500	female		-	+	-	+	+	-	-	-	C C	T T	A A
1031	female		-	+	-	-	+	-	-	-	C T	G T	A G
1447	female		+	-	-	+	+	-	-	-	C C	T T	A A
932	male		+	-	-	-	+	-	-	-	C C	T T	A A
1790	male		+	-	-	-	+	-	-	-	C C	T T	A A
1130	male		+	-	-	+	+	-	-	-	C C	T T	A A
966	female		+	-	-	+	+	-	-	-	C C	T T	A A
1643	male		+	-	-	+	+	-	-	-	C C	T T	A A
990	male		+	-	-	+	+	-	-	-	C C	T T	A A
1605	male		+	-	-	+	+	-	-	-	C C	T T	A A
551	male		+	-	-	-	+	-	-	-	C C	T T	A A
814	male		+	-	-	+	+	-	-	-	C C	T T	A A
1558	male		-	-	-	+	+	-	-	-	C C	T T	A A
1479	male		-	+	-	+	+	-	-	-	C C	T T	A A
701	female		+	-	-	+	+	-	-	-	C C	T T	A A
1381	male		-	-	-	+	+	-	-	-	C C	T T	A A
517	male		+	+	-	+	+	-	-	-	C C	T T	A A
776	female		+	-	-	+	+	-	-	-	C C	T T	A A
592	female		-	-	-	-	+	-	-	-	C C	T T	A A
1450	male		+	-	-	+	+	-	-	-	C C	T T	A A
1759	female		+	-	-	+	+	-	-	-	C C	T T	A A
501	male		-	+	-	+	+	-	-	-	C C	T T	A A
1105	female		-	-	-	+	+	-	-	-	C T	G T	A G
1200	male	1.05*105	+	-	-	+	+	-	-	-	C C	T T	A A
627	male	1.1*103	+	-	-	+	+	-	-	-	C C	T T	A A
1797	male	1.18*105	+	-	-	+	+	-	-	-	C C	T T	A A
781	male	1.24*103	+	-	-	+	+	-	-	-	C C	T T	A A
603	male	1.26*107	+	-	-	+	+	-	-	-	C T	G T	A G
1938	male	1.36*103	+	-	-	+	+	-	-	-	C C	T T	A A
1973	male	1.41*105	+	-	-	+	+	-	-	-	C C	T T	A A
636	male	1.44*103	+	-	-	+	+	-	-	-	C T	G T	A G
1397	male	1.47*103	+	-	-	+	+	-	-	-	C C	T T	A A
448	male	1.47*107	+	-	+	-	+	-	-	-	C C	T T	A A
1131	female	1.78*103	+	-	-	+	+	-	-	-	C C	T T	A A
1846	female	1.78*105	+	-	+	-	+	-	-	-	C T	G T	A G
606	female	1.8*106	+	-	+	-	+	-	-	-	C C	T T	A A
1758	male	1.81*106	+	-	-	+	+	-	-	-	C T	G T	A G
1579	male	1.83*107	+	-	+	-	+	-	-	-	C C	T T	A A
707	male	1.84*106	+	-	-	+	+	-	-	-	C T	G T	A G
1666	female	1.89*104	+	-	+	-	+	-	-	-	C C	T T	A A
851	male	2.07*103	+	-	-	+	+	-	-	-	C C	T T	A A
921	male	2.18*103	+	-	+	+	+	-	-	-	C C	T T	A A
1321	female	2.19*103	+	-	-	+	+	-	-	-	C C	T T	A A
1497	male	2.39*104	+	-	-	+	+	-	-	-	C C	T T	A A
1923	female	2.4*103	+	-	-	+	+	-	-	-	C C	T T	A A
1890	male	2.41*103	+	-	-	+	+	-	-	-	C C	T T	A A
473	male	2.43*106	+	-	-	+	+	-	-	-	C C	T T	A A
1297	male	2.46*106	+	-	-	+	+	-	-	-	C C	T T	A A
1522	male	2.8*106	+	-	+	+	+	-	-	+	C C	T T	A A
1203	male	2.87*106	+	-	+	-	+	-	-	-	C C	T T	A A
1915	female	3.07*108	+	-	+	-	+	-	-	-	C T	G T	A G
939	female	3.36*103	+	-	+	-	+	-	-	-	C C	T T	A A
1809	male	3.55*104	+	-	-	+	+	-	-	-	C C	T T	A A
1370	male	3.59*105	+	-	+	-	+	-	-	-	C T	G T	A G
1386	male	3.65*105	+	-	-	-	+	-	-	-	C C	T T	A A
1298	male	3.71*104	+	-	-	+	+	-	-	-	C T	G T	A G
801	female	3.75*107	+	-	+	-	+	-	-	-	C C	T T	A A
637	male	3.99*107	+	-	+	-	+	-	-	-	C C	T T	A A
980	male	4.56*105	+	-	-	+	+	-	-	-	C C	T T	A A
751	male	4.86*103	+	-	-	+	+	-	-	-	C C	T T	A A
1649	male	5.05*102	+	-	-	+	+	-	-	-	C C	T T	A A
1673	male	5.06*102	+	-	-	+	+	-	-	-	C C	T T	A A
1621	female	5.06*102	+	-	-	+	+	-	-	-	C C	T T	A A
1680	male	5.13*102	+	-	-	+	+	-	-	-	C C	T T	A A
1582	male	5.15*102	+	-	-	+	+	-	-	-	C C	T T	A A
1500	male	5.2*102	+	-	-	+	+	-	-	-	C T	G T	A G
1016	male	5.24*103	+	-	-	+	+	-	-	-	C C	T T	A A
1644	male	5.82*102	+	-	-	+	+	-	-	-	C T	G T	A G
527	male	6.37*104	+	-	-	-	+	-	-	-	C C	T T	A A
625	male	6.55*105	+	-	-	+	+	-	-	-	C C	T T	A A
1391	male	6.72*102	+	-	-	+	+	-	-	-	C C	T T	A A
1076	male	7.2*104	+	-	-	+	+	-	-	-	C C	T T	A A
1225	male	7.28*104	+	-	-	-	+	-	-	-	C C	T T	A A
1038	male	7.31*102	+	-	-	+	+	-	-	-	C C	T T	A A
1124	male	7.38*103	+	-	-	-	+	-	-	-	C C	T T	A A
1073	male	7.53*102	+	-	-	+	+	-	-	-	C C	T T	A A
1371	female	8.09*105	+	-	+	-	+	-	-	-	C C	T T	A A
1891	female	8.15*103	+	-	-	+	+	-	-	-	C C	T T	A A
552	male	8.48*103	+	-	-	+	+	-	-	-	C C	T T	A A
1132	female	8.93*103	+	-	-	+	+	-	-	-	C C	T T	A A
616	male	9.78*102	+	-	-	+	+	-	-	-	C C	T T	A A
804	female		+	-	-	+	+	-	-	-	C C	T T	A A
782	female		-	+	-	+	+	-	-	-	C C	T T	A A
1833	female		+	-	-	+	+	-	-	-	C C	T T	A A
913	male		-	+	-	-	+	-	-	-	C C	T T	A A
1488	male		+	-	-	+	+	-	-	-	C C	T T	A A
1857	male		-	+	-	+	+	-	-	-	C C	T T	A A
1330	male		+	-	-	-	+	-	-	-	C C	T T	A A
1506	male		-	+	-	-	+	-	-	-	C C	T T	A A
691	female		-	+	-	-	+	-	-	-	C C	T T	A A
813	male		-	+	-	-	+	-	-	-	C C	T T	A A
1327	female		+	-	-	+	+	-	-	-	C T	G T	A G
1911	male		-	+	-	-	+	-	-	-	C C	T T	A A
587	female		+	-	-	+	+	-	-	-	C C	T T	A A
1719	male		+	-	-	+	+	-	-	-	T T	G G	A G
979	male		-	+	-	-	+	-	-	-	C C	T T	A A
1367	male		-	+	-	+	-	-	-	-	C C	T T	A A
1172	female		-	+	-	-	+	-	-	-	C C	T T	A A
954	female		-	+	-	-	+	-	-	-	C C	T T	A A
1222	male		-	+	-	+	+	-	-	-	C C	T T	A A
1158	male		-	+	-	-	+	-	-	-	C C	T T	A A
1955	female		+	-	-	-	+	-	-	-	C C	T T	A A
1898	male		-	+	-	-	+	-	-	-	C C	T T	A A
965	male		+	-	-	+	+	-	-	-	C C	T T	A A
731	male		+	-	-	-	+	-	-	-	C C	T T	A A
798	male		+	-	-	+	+	-	-	-	C C	T T	A A
1314	male		+	-	-	+	+	-	-	-	C T	G T	A G
1862	female		+	-	-	-	+	-	-	-	C C	T T	A A
1214	female		+	+	-	-	+	-	-	-	C C	T T	A A
1250	male		+	-	-	+	+	-	-	-	C T	T T	A G
892	male		-	+	-	-	+	-	-	-	C C	T T	A A
1899	male		+	-	-	-	+	-	-	-	C C	T T	A A
1126	male		+	-	-	+	+	-	-	-	C C	T T	A A
573	female		+	-	-	+	+	-	-	-	C C	T T	A A
608	male		-	-	-	-	+	-	-	-	C C	T T	A A
978	female		+	-	-	+	+	-	-	-	C C	T T	A G
963	female		+	-	-	+	+	-	-	-	C C	T T	A A
879	female		-	+	-	+	+	-	-	-	C C	T T	A A
1679	female		-	+	-	-	+	-	-	-	C C	T T	A A
1687	male		+	-	-	-	+	-	-	-	C C	T T	A A
1791	female		+	-	-	+	+	-	-	-	C C	T T	A A
1482	male		-	+	-	+	+	-	-	-	C C	T T	A A
593	female		+	-	-	+	+	-	-	-	C T	G T	A G
1892	male		+	-	-	+	+	-	-	-	C C	T T	A A
1628	female		+	-	-	-	+	-	-	-	C T	G T	A G
1486	male		-	+	-	-	+	-	-	-	C C	T T	A A
856	female		-	-	-	+	+	-	-	-	C C	T T	A A
888	female		-	+	-	-	+	-	-	-	C T	G T	A G
1307	male		+	-	-	+	+	-	-	-	C C	T T	A A
1737	male		-	-	-	+	+	-	-	-	C C	T T	A A
937	female		-	-	-	-	+	-	-	-	C T	G T	A G
1419	female		-	+	-	+	+	-	-	-	C T	G T	A G
1994	female		-	+	-	+	+	-	-	-	C C	T T	A A
1472	female		+	-	-	+	+	-	-	-	C C	T T	A A
1925	female		-	+	-	-	+	-	-	-	C C	T T	A A
788	male		+	-	+	-	+	-	-	-	C C	T T	A A
1457	male		+	-	-	-	+	-	-	-	C C	T T	A A
1007	male		-	+	-	-	+	-	-	-	C C	T T	A A
882	male		-	+	-	+	+	-	-	-	C C	T T	A A
1590	female		-	+	-	+	+	-	-	-	C C	T T	A A
584	female		-	+	-	+	+	-	-	-	C C	T T	A A
1455	female		-	+	-	-	+	-	-	-	C C	T T	A A
1032	male		-	+	-	+	+	-	-	-	C C	T T	A A
1226	female		+	-	-	+	+	-	-	-	C C	T T	A A
869	female		-	+	-	+	+	-	-	-	C C	T T	A A
720	male		+	-	-	+	+	-	-	-	C C	T T	A A
1777	female		-	+	-	-	+	-	-	-	C C	T T	A A
826	female		-	+	-	-	+	-	-	-	C C	T T	A A
1928	female		+	+	-	+	+	-	-	-	C C	T T	A A
878	female		-	-	-	+	+	-	-	-	C C	T T	A A
1766	female		-	+	-	-	+	-	-	-	C C	T T	A A
1475	female		+	-	-	+	+	-	-	-	C C	T T	A A
1953	female		-	-	-	-	+	-	-	-	C C	T T	A A
1904	female		-	+	-	-	+	-	-	-	C C	T T	A A
852	male		+	-	-	+	+	-	-	-	C C	T T	A A
1068	female		-	+	-	-	+	-	-	-	C C	T T	A A
516	male		+	-	-	+	+	-	-	-	C C	T T	A A
1345	female		-	+	-	+	+	-	-	-	C C	T T	A A
1895	male		+	+	-	+	+	-	-	-	C C	T T	A A
1569	male		+	-	-	+	+	-	-	-	C C	T T	A A
1026	female		-	+	-	-	+	-	-	-	C C	T T	A A
489	female		+	-	-	+	+	-	-	-	C C	T T	A A
1215	male		-	+	-	-	+	-	-	-	C C	T T	A A
1013	male		+	-	-	+	+	-	-	-	C C	T T	A A
1505	male		+	-	-	+	+	-	-	-	C C	T T	A A
1636	male		-	-	-	-	+	-	-	-	C C	T T	A A
1576	male		-	+	-	-	+	-	-	-	C C	T T	A A
618	female		+	-	-	+	+	-	-	-	C C	T T	A A
622	female		-	+	-	-	+	-	-	-	C C	T T	A A
1344	male		+	-	-	+	+	-	-	-	C C	T T	A A
1709	male		+	-	-	+	+	-	-	-	C C	T T	A A
854	female		+	-	-	+	+	-	-	-	C C	T T	A A
1268	male		-	+	-	-	+	-	-	-	C C	T T	A A
959	male		+	-	-	+	+	-	-	-	C C	T T	A A
1747	female		-	+	-	-	+	-	-	-	C C	T T	A A
784	female		-	+	-	+	+	-	-	-	C C	T T	A A
957	female		-	+	-	+	+	-	-	-	C C	T T	A A
1536	female		-	+	-	-	+	-	-	-	C C	T T	A A
1557	male		-	+	-	+	+	-	-	-	C C	T T	A A
1715	male		-	+	-	-	+	-	-	-	C C	G T	A G
1492	male		+	-	+	-	+	-	-	-	C C	T T	A A
1422	male		+	-	-	+	+	-	-	-	C C	T T	A A
1532	female		-	+	-	+	+	-	-	-	C C	T T	A A
1063	female		-	+	-	+	+	-	-	-	C C	T T	A A
1318	male		+	-	-	+	+	-	-	-	C C	T T	A A
1578	female		+	-	-	+	+	-	-	-	T T	G T	G G
992	male		+	-	-	+	+	-	-	-	C C	T T	A A
1633	male		+	-	-	+	+	-	-	-	C C	T T	A A
687	male		-	+	-	-	+	-	-	-	C C	T T	A A
1243	male		-	+	-	-	+	-	-	-	C C	T T	A A
1587	male		+	-	-	-	+	-	-	-	C C	T T	A G
1021	female		-	+	-	-	+	-	-	-	C C	T T	A A
968	male		-	+	-	+	+	-	-	-	C C	T T	A A
703	male		+	-	-	+	+	-	-	-	C T	G T	A G
940	female		-	+	-	-	+	-	-	-	C C	T T	A A
1230	female		+	-	-	+	+	-	-	-	C T	G T	A G
807	female		-	+	-	-	+	-	-	-	C C	T T	A A
1149	female		-	+	-	+	+	-	-	-	C C	T T	A A
1565	male		+	-	-	+	+	-	-	-	C T	G T	A G
1393	female		-	+	-	-	+	-	-	-	C C	T T	A A
1080	male		-	+	-	-	+	-	-	-	C T	G T	A G
1382	female		-	+	-	-	+	-	-	-	C C	T T	A A
646	female		-	+	-	-	+	-	-	-	C C	T T	A A
688	female		-	-	-	-	+	-	-	-	C C	T T	A A
1941	female		-	+	-	-	+	-	-	-	C C	T T	A A
719	male		+	-	-	+	+	-	-	-	C C	T T	A A
1041	male		+	-	-	+	+	-	-	-	C C	T T	A A
1575	male		-	+	-	-	+	-	-	-	C C	T T	A A
1630	male		+	-	+	-	+	-	-	-	C C	T T	A A
1795	female		-	+	-	-	+	-	-	-	C C	T T	A A
1563	female		+	-	+	-	+	-	-	-	C T	G T	A G
800	male		-	+	-	+	+	-	-	-	C C	T T	A A
1361	female		-	+	-	-	+	-	-	-	C C	T T	A A
658	female		-	+	-	+	+	-	-	-	C C	T T	A A
1748	female		-	+	-	+	+	-	-	-	C C	T T	A A
806	female		-	+	-	-	+	-	-	-	C C	T T	A G
1607	male		+	-	+	-	+	-	-	-	C C	T T	A A
844	male		-	+	-	-	+	-	-	-	C C	T T	A A
729	female		-	+	-	-	+	-	-	-	C C	T T	A A
1991	male		-	+	-	+	+	-	-	-	C C	T T	A A
1564	female		-	+	-	-	+	-	-	-	C C	T T	A A
1328	male		+	-	-	+	+	-	-	-	C C	T T	A A
1967	male		-	+	-	-	+	-	-	-	C C	T T	A A
586	female		+	-	-	-	+	-	-	-	C C	T T	A A
886	female		-	+	-	-	+	-	-	-	C C	T T	A A
865	male		+	-	-	-	+	-	-	-	C C	T T	A A
1720	male		-	+	-	+	+	-	-	-	C C	T T	A A
705	female		-	-	-	-	+	-	-	-	C T	G T	A G
1012	male		-	+	-	-	+	-	-	-	C C	T T	A A
690	male		-	+	-	+	+	-	-	-	C C	T T	A A
971	female		+	-	-	+	+	-	-	-	C C	T T	A A
1263	male		+	-	+	-	+	-	-	-	C T	G T	A G
1313	female		+	-	-	+	+	-	-	-	C C	T T	A A
802	male		-	+	-	+	+	-	-	-	C C	T T	A A
1999	male		+	-	-	-	+	-	-	-	C C	T T	A A
1577	male		-	+	-	-	+	-	-	-	C C	T T	A A
1964	male		+	-	-	+	+	-	-	-	C C	T T	A A
1184	male		+	-	+	-	+	-	-	-	C C	T T	A A
1942	male		+	-	+	-	+	-	-	-	C C	T T	A A
1924	male		-	+	-	-	+	-	-	-	C C	T T	A A
997	male		-	+	-	-	+	-	-	-	C C	T T	A A
905	female		-	+	-	-	+	-	-	-	C C	T T	A A
1606	male		-	+	-	+	+	-	-	-	C C	T T	A A
1436	female		-	+	-	-	+	-	-	-	C C	T T	A A
505	female		-	+	-	-	+	-	-	-	C C	T T	A A
747	male		-	+	-	+	+	-	-	-	C C	T T	A A
1667	male		-	+	-	-	+	-	-	-	C C	T T	A A
1351	male		-	-	-	-	+	-	-	-	C C	T T	A A
1442	male		-	+	-	-	+	-	-	-	C C	T T	A A
1802	male		-	+	-	-	+	-	-	-	C C	T T	A A
1445	male		+	-	+	-	+	-	-	-	C C	G T	A A
1769	male		-	+	-	-	+	-	-	-	C T	T T	A G
666	male		-	+	-	-	+	-	-	-	C C	T T	A A
1881	male		+	+	-	+	+	-	-	-	C C	T T	A A
1375	female		-	+	-	+	+	-	-	-	C C	T T	A A
767	male		+	-	-	+	+	-	-	-	C C	T T	A A
1217	female		+	-	-	+	+	-	-	-	C C	T T	A A
1042	female		-	+	-	-	+	-	-	-	C C	T T	A A
1706	female		-	+	-	+	+	-	-	-	C C	T T	A A
1970	male		-	+	-	-	+	-	-	-	C T	G T	A G
1147	female		-	+	-	-	+	-	-	-	C C	T T	A A
1661	male		-	+	-	-	+	-	-	-	C C	T T	A A
1292	female		-	+	-	-	+	-	-	-	C C	T T	A A
828	male		-	+	-	-	+	-	-	-	C C	T T	A A
1368	female		-	+	-	-	+	-	-	-	C C	T T	A A
1775	male		+	-	-	+	+	-	-	-	C C	T T	A A
635	female		-	+	-	+	+	-	-	-	C C	T T	A A
1943	male		+	-	-	+	+	-	-	-	C C	T T	A A
1489	female		-	+	-	-	+	-	-	-	C C	T T	A A
519	male		+	-	-	+	+	-	-	-	C C	T T	A A
506	male		+	-	-	+	+	-	-	-	C C	T T	A A
1384	female		-	+	-	+	+	-	-	-	C C	T T	A A
1779	male		-	+	-	+	+	-	-	-	C T	G T	A G
1962	female		+	-	-	+	+	-	-	-	C C	T T	A A
1818	male		-	+	-	-	+	-	-	-	C C	T T	A A
1423	male		+	-	-	+	+	-	-	-	C C	T T	A A
1387	female		-	+	-	-	+	-	-	-	C C	T T	A A
1524	female		+	-	-	+	+	-	-	-	C C	T T	A A
1743	female		+	-	-	-	+	-	-	-	C C	T T	A A
834	female		-	+	-	+	+	-	-	-	C C	T T	A A
674	female		-	+	-	-	+	-	-	-	C C	T T	A A
1599	male		+	-	+	-	+	-	-	-	C C	T T	A A
1638	male		+	-	-	+	+	-	-	-	C C	T T	A A
1194	female		+	-	-	+	+	-	-	-	C C	T T	A A
1902	female		-	+	-	-	+	-	-	-	C C	T T	A A
930	female		-	+	-	-	+	-	-	-	C C	T T	A A
613	male		-	+	-	-	+	-	-	-	C C	T T	A A
1343	male		+	-	-	+	+	-	-	-	C C	T T	A A
1717	female		-	-	-	-	+	-	-	-	C C	T T	A A
1279	female		-	+	-	-	+	-	-	-	C T	G T	A G
1229	male		+	-	-	+	+	-	-	-	C C	T T	A A
1161	male		+	-	-	-	+	-	-	-	C C	T T	A A
1403	female		-	+	-	+	+	-	-	-	C C	T T	A A
1586	female		-	+	-	-	+	-	-	-	C C	T T	A A
498	male		+	-	+	-	+	-	-	-	C C	T T	A A
917	male		-	-	-	-	+	-	-	-	C C	T T	A A
661	female		+	-	-	+	+	-	-	-	C C	T T	A A
1290	male		+	-	-	+	+	-	-	-	C C	T T	A A
1280	female		-	+	-	+	+	-	-	-	C C	T T	A A
1459	male		-	+	-	-	+	-	-	-	C C	T T	A A
1487	female		-	+	-	-	+	-	-	-	C C	T T	A A
1009	female		-	+	-	+	+	-	-	-	C C	T T	A A
1444	male		+	-	-	+	+	-	-	-	C C	T T	A A
1091	female		+	-	+	-	+	-	-	-	C C	T T	A A
967	male		-	+	-	+	+	-	-	-	C C	T T	A A
724	female		-	+	-	+	+	-	-	-	C C	T T	A A
1823	male		+	-	-	-	+	-	-	-	C C	T T	A A
1863	male		-	-	-	-	+	-	-	-	C C	T T	A A
1116	male		-	+	-	-	+	-	-	-	C C	T T	A A
887	female		-	+	-	-	+	-	-	-	C C	T T	A A
1580	female		-	+	-	+	+	-	-	-	C C	T T	A A
1317	female		-	+	-	-	+	-	-	-	C C	T T	A A
1957	female		-	+	-	+	+	-	-	-	C C	T T	A A
829	female		-	+	-	-	+	-	-	-	C C	T T	A A
1097	female		-	+	-	+	+	-	-	-	C C	T T	A A
816	male		+	-	-	+	+	-	-	-	C C	T T	A A
1078	female		-	+	-	-	+	-	-	-	C C	T T	A A
1888	female		-	+	-	-	+	-	-	-	C C	T T	A A
1778	female		-	-	-	-	+	-	-	-	C C	T T	A A
1779	male		+	-	-	+	+	-	-	-	C C	T T	A A
1168	male		+	-	-	-	+	-	-	-	C C	T T	A A
1121	male		+	-	-	+	+	-	-	-	C C	T T	A A
993	female		-	+	-	-	+	-	-	-	C T	G T	A G
1870	male		-	+	-	-	+	-	-	-	C C	T T	A A
477	male		-	+	-	-	+	-	-	-	C C	T T	A A
1209	female		-	+	-	-	+	-	-	-	C C	T T	A A
1030	female		-	+	-	-	+	-	-	-	C C	T T	A A
1453	female		-	+	-	-	+	-	-	-	C C	T T	A A
972	female		-	+	-	-	+	-	-	-	C C	T T	A A
1914	female		-	-	-	+	+	-	-	-	C C	T T	A A
1783	female		-	+	-	-	+	-	-	-	C C	T T	A A
1205	male		-	+	-	-	+	-	-	-	C C	T T	A A
1753	male		-	+	-	+	+	-	-	-	C C	T T	A A
1694	male		-	+	-	-	+	-	-	-	C C	T T	A A
1036	male		-	+	-	-	+	-	-	-	C C	T T	A A
1927	female		-	+	-	+	+	-	-	-	C C	T T	A A
1525	female		-	+	-	-	+	-	-	-	C C	T T	A A
1062	male		-	+	-	+	+	-	-	-	C C	T T	A A
660	female		+	-	-	+	+	-	-	-	C T	G T	A G
1837	male		-	+	-	+	+	-	-	-	C T	G T	A G
1326	female		-	+	-	-	+	-	-	-	C C	T T	A A
1140	male		-	+	-	+	+	-	-	-	C C	T T	A A
1099	female		-	+	-	+	+	-	-	-	C T	G T	A A
1112	male		-	+	-	+	+	-	-	-	C C	T T	A A
1035	male		-	-	-	+	+	-	-	-	C C	T T	A A
903	male		-	+	-	-	+	-	-	-	C C	T T	A A
1374	male		+	-	-	+	+	-	-	-	C C	T T	A A
633	male		+	-	-	+	+	-	-	-	C C	T T	A A
1467	female		-	+	-	+	+	-	-	-	C C	T T	A A
1071	male		+	-	-	+	+	-	-	-	C C	T T	A A
550	male		-	+	-	+	+	-	-	-	C C	T T	A A
617	female		-	+	-	+	+	-	-	-	C C	T T	A A
1733	female		-	+	-	+	+	-	-	-	C T	G T	A G
941	female		-	-	-	-	+	-	-	-	C C	T T	A A
467	male		-	+	-	-	+	-	-	-	C T	G T	A G
533	female		-	+	-	+	+	-	-	-	C C	T T	A A
757	female		-	-	-	-	+	-	-	-	C C	T T	A A
811	male		-	+	-	+	+	-	-	-	C C	T T	A A
741	male		+	+	-	-	+	-	-	-	C C	T T	A A
1362	female		+	-	-	+	+	-	-	-	C C	T T	A A
1903	female		-	+	-	-	+	-	-	-	C T	G T	A G
1188	male		-	+	-	-	+	-	-	-	C C	T T	A A
1134	male		-	+	-	-	+	-	-	-	C C	T T	A A
1653	female		-	+	-	+	+	-	-	-	C T	T T	A G
1956	female		-	+	-	-	+	-	-	-	C C	T T	A A
1144	male		+	-	-	-	+	-	-	-	C C	T T	A A
1798	female		+	-	-	+	+	-	-	-	C C	T T	A A
1228	female		+	-	-	-	+	-	-	-	C C	T T	A A
736	male		+	-	-	+	+	-	-	-	C C	T T	A A
629	male		+	-	-	+	+	-	-	-	C C	T T	A A
1429	female		-	+	-	-	+	-	-	-	C C	T T	A A
1454	female		-	+	-	+	+	-	-	-	C T	T T	A G
700	female		+	-	-	-	+	-	-	-	C C	T T	A A
1460	male		+	-	-	+	+	-	-	-	C C	T T	A A
1608	male		+	-	-	-	+	-	-	-	C C	T T	A A
1392	male		+	-	-	+	+	-	-	-	C T	G T	A G
950	male		-	-	-	+	+	-	-	-	C C	T T	A A
1083	male		-	+	-	-	+	-	-	-	C C	T T	A A
908	male		+	-	-	-	+	-	-	-	C C	T T	A A
1592	male		+	-	-	-	+	-	-	-	C T	G T	A A
1873	male		+	-	-	+	+	-	-	-	C T	G T	A G
1631	male		+	-	-	+	+	-	-	-	C C	T T	A A
1765	female		+	-	-	+	+	-	-	-	C C	T T	A A
848	male		+	-	-	+	+	-	-	-	C C	T T	A A
1952	female		+	-	-	+	+	-	-	-	C C	T T	A A
518	female		-	+	-	+	+	-	-	-	C C	T T	A A
1674	female		-	+	-	+	+	-	-	-	C C	T T	A A
1897	male		+	-	-	+	+	-	-	-	C C	T T	A A
1812	female		-	+	-	+	-	-	-	-	C C	T T	A A
1417	female		-	+	-	+	+	-	-	-	C C	T T	A A
490	male		+	-	-	+	+	-	-	-	C C	T T	A A
1408	female		+	-	-	+	+	-	-	-	C C	T T	A A
1552	male		-	+	-	-	+	-	-	-	C C	T T	A A
1516	male		-	+	-	-	+	-	-	-	C C	T T	A A
1647	male		+	-	-	+	+	-	-	-	C C	T T	A A
1515	female		-	+	-	+	+	-	-	-	C C	T T	A A
544	male		+	-	-	+	+	-	-	-	C C	T T	A A
1725	female		-	+	-	+	+	-	-	-	C C	T T	A A
474	female		-	+	-	+	+	-	-	-	C C	T T	A A
581	male		-	+	-	+	+	-	-	-	C C	T T	A A
1369	male		-	+	-	+	+	-	-	-	C C	T T	A A
1544	male		+	-	-	+	+	-	-	-	C C	T T	A A
1865	female		-	+	-	-	+	-	-	-	C C	T T	A A
739	female		+	+	-	+	+	-	-	-	C C	T T	A A
1117	female		-	+	-	-	+	-	-	-	C C	T T	A A
1948	female		-	+	-	-	+	-	-	-	C C	T T	A A
1523	female		-	+	-	+	+	-	-	-	C C	T T	A A
1446	male		-	+	-	-	+	-	-	-	C T	G T	A G
1240	male		+	-	-	+	+	-	-	-	C C	T T	A A
1065	female		-	-	-	+	+	-	-	-	C C	T T	A A
1329	female		+	-	-	+	+	-	-	-	C C	T T	A A
1410	male		-	+	-	+	+	-	-	-	C C	T T	A A
1939	male		-	-	-	-	+	-	-	-	C C	T T	A A
793	female		-	+	-	+	+	-	-	-	C C	T T	A A
1749	female		-	+	-	-	+	-	-	-	C C	T T	A A
1921	female		-	-	-	-	+	-	-	-	C C	T T	A A
742	male		+	-	-	+	+	-	-	-	C C	T T	A A
925	female		-	+	-	-	+	-	-	-	C C	T T	A A
1669	female		-	+	-	-	+	-	-	-	C C	T T	A A
795	female		+	-	-	+	+	-	-	-	C T	G T	A G
1322	female		-	+	-	+	+	-	-	-	C C	T T	A A
912	female		-	+	-	-	+	-	-	-	C T	G T	A G
1554	male		+	-	-	+	+	-	-	-	C C	T T	A A
1385	female		-	+	-	+	+	-	-	-	C C	T T	A A
1044	female		-	+	-	+	+	-	-	-	C C	T T	A A
791	female		-	+	-	-	+	-	-	-	C C	T T	A A
1218	male		-	+	-	+	+	-	-	-	C C	T T	A A
1810	male		-	+	-	+	+	-	-	-	C C	T T	A A
470	female		-	+	-	-	+	-	-	-	C C	T T	A A
1396	male		-	+	-	+	+	-	-	-	C C	T T	A A
1033	male		-	+	-	-	+	-	-	-	C C	T T	A A
1008	male		-	+	-	+	+	-	-	-	C C	T T	A A
1750	female		-	+	-	-	+	-	-	-	C T	G T	A G
1238	male		-	+	-	-	+	-	-	-	C C	T T	A A
1001	female		-	+	-	-	+	-	-	-	C T	G T	A G
1092	male		+	-	-	+	+	-	-	-	C C	T T	A A
1466	male		-	+	-	+	+	-	-	-	C C	T T	A A
710	male		-	+	-	-	+	-	-	-	C C	T T	A A
1199	female		-	+	-	+	+	-	-	-	C C	T T	A A
1254	male		+	-	-	-	+	-	-	-	C C	T T	A A
1468	female		-	+	-	+	+	-	-	-	C C	T T	A A
1333	male		-	+	-	-	+	-	-	-	C C	T T	A A
902	female		-	+	-	-	+	-	-	-	C C	T T	A A
1501	female		-	+	-	-	+	-	-	-	C T	T T	A G
1002	male		-	+	-	-	+	-	-	-	C C	T T	A A
1886	male		-	-	-	+	+	-	-	-	C C	T T	A A
945	male		-	+	-	-	+	-	-	-	C C	T T	A A
1173	male		+	+	-	+	+	-	-	-	C T	G T	A G
1186	female		+	-	+	-	+	-	-	-	C C	T T	A A
1929	female		+	-	-	+	+	-	-	-	C C	T T	A A
1808	female		-	+	-	+	+	-	-	-	C C	T T	A A
948	male		+	-	-	+	+	-	-	-	C C	T T	A A
679	male		+	-	+	-	+	-	-	-	C C	T T	A A
1320	female		-	+	-	+	+	-	-	-	C C	T T	A A
1000	female		-	+	-	+	+	-	-	-	C C	T T	A A
1604	female		-	+	-	+	+	-	-	-	C C	T T	A A
449	male		-	+	-	+	+	-	-	-	C C	T T	A A
1377	female		-	+	-	+	+	-	-	-	C T	G T	A G
1746	female		-	+	-	+	+	-	-	-	C C	T T	A A
649	male		+	-	-	+	+	-	-	-	C C	T T	A A
