# Supplementary material for: Association between genetic polymorphisms of the IL28B gene and leukomonocyte in Chinese hepatitis B virus-infected individuals
Source: PeerJ. 2017 Dec 19;5:e4149. doi: 10.7717/peerj.4149 (PMC5740955; doi:10.7717/peerj.4149)
Supplement: Supplemental Information 3 — Genotypes of three SNPs in control persons. [file peerj-05-4149-s003.xlsx]

## Sheet: Sheet1
Supplementary table 3. Genotypes of three SNPs in control persons
Sample No.	rs12979860	rs8099917	rs12980275
839	C T	G T	A A
7	C C	T T	A A
8	C C	T T	A A
12	C C	T T	A A
13	C C	T T	A A
14	C C	T T	A A
18	C C	T T	A A
21	C C	T T	A A
22	C C	T T	A A
23	C C	T T	A A
24	C C	T T	A A
25	C C	T T	A A
26	C C	T T	A A
29	C C	T T	A A
31	C C	T T	A A
38	C C	T T	A A
40	C C	T T	A A
41	C C	T T	A A
44	C C	T T	A A
45	C C	T T	A A
51	C C	T T	A A
52	C C	T T	A A
55	C C	T T	A A
56	C C	T T	A A
57	C C	T T	A A
58	C C	T T	A A
60	C C	T T	A A
65	C C	T T	A A
67	C C	T T	A A
68	C C	T T	A A
71	C C	T T	A A
73	C C	T T	A A
83	C C	T T	A A
84	C C	T T	A A
85	C C	T T	A A
86	C C	T T	A A
89	C C	T T	A A
91	C C	T T	A A
92	C C	T T	A A
94	C C	T T	A A
95	C C	T T	A A
100	C C	T T	A A
102	C C	T T	A A
104	C C	T T	A A
107	C C	T T	A A
116	C C	T T	A A
119	C C	T T	A A
123	C C	T T	A A
124	C C	T T	A A
126	C C	T T	A A
136	C C	T T	A A
138	C C	T T	A A
142	C C	T T	A A
143	C C	T T	A A
144	C C	T T	A A
146	C C	T T	A A
147	C C	T T	A A
148	C C	T T	A A
154	C C	T T	A A
155	C C	T T	A A
158	C C	T T	A A
160	C C	T T	A A
165	C C	T T	A A
167	C C	T T	A A
172	C C	T T	A A
177	C C	T T	A A
178	C C	T T	A A
181	C C	T T	A A
182	C C	T T	A A
183	C C	T T	A A
191	C C	T T	A A
192	C C	T T	A A
193	C C	T T	A A
194	C C	T T	A A
196	C C	T T	A A
197	C C	T T	A A
198	C C	T T	A A
199	C C	T T	A A
201	C C	T T	A A
203	C C	T T	A A
204	C C	T T	A A
206	C C	T T	A A
207	C C	T T	A A
208	C C	T T	A A
211	C C	T T	A A
212	C C	T T	A A
213	C C	T T	A A
217	C C	T T	A A
218	C C	T T	A A
219	C C	T T	A A
222	C C	T T	A A
223	C C	T T	A A
225	C C	T T	A A
226	C C	T T	A A
227	C C	T T	A A
232	C C	T T	A A
233	C C	T T	A A
234	C C	T T	A A
235	C C	T T	A A
236	C C	T T	A A
237	C C	T T	A A
240	C C	T T	A A
241	C C	T T	A A
242	C C	T T	A A
247	C C	T T	A A
251	C C	T T	A A
259	C C	T T	A A
261	C C	T T	A A
262	C C	T T	A A
264	C C	T T	A A
266	C C	T T	A A
267	C C	T T	A A
268	C C	T T	A A
273	C C	T T	A A
276	C C	T T	A A
278	C C	T T	A A
281	C C	T T	A A
282	C C	T T	A A
286	C C	T T	A A
289	C C	T T	A A
290	C C	T T	A A
291	C C	T T	A A
292	C C	T T	A A
298	C C	T T	A A
301	C C	T T	A A
303	C C	T T	A A
305	C C	T T	A A
307	C C	T T	A A
312	C C	T T	A A
314	C C	T T	A A
316	C C	T T	A A
317	C C	T T	A A
318	C C	T T	A A
319	C C	T T	A A
321	C C	T T	A A
322	C C	T T	A A
323	C C	T T	A A
325	C C	T T	A A
326	C C	T T	A A
328	C C	T T	A A
329	C C	T T	A A
331	C C	T T	A A
332	C C	T T	A A
338	C C	T T	A A
339	C C	T T	A A
340	C C	T T	A A
342	C C	T T	A A
343	C C	T T	A A
345	C C	T T	A A
346	C C	T T	A A
347	C C	T T	A A
349	C C	T T	A A
352	C C	T T	A A
354	C C	T T	A A
355	C C	T T	A A
359	C C	T T	A A
360	C C	T T	A A
361	C C	T T	A A
363	C C	T T	A A
366	C C	T T	A A
367	C C	T T	A A
369	C C	T T	A A
370	C C	T T	A A
373	C C	T T	A A
375	C C	T T	A A
377	C C	T T	A A
379	C C	T T	A A
382	C C	T T	A A
383	C C	T T	A A
384	C C	T T	A A
385	C C	T T	A A
386	C C	T T	A A
387	C C	T T	A A
388	C C	T T	A A
390	C C	T T	A A
391	C C	T T	A A
392	C C	T T	A A
393	C C	T T	A A
394	C C	T T	A A
395	C C	T T	A A
397	C C	T T	A A
398	C C	T T	A A
403	C C	T T	A A
404	C C	T T	A A
405	C C	T T	A A
410	C C	T T	A A
411	C C	T T	A A
412	C C	T T	A A
413	C C	T T	A A
414	C C	T T	A A
416	C C	T T	A A
418	C C	T T	A A
420	C C	T T	A A
423	C C	T T	A A
425	C C	T T	A A
428	C C	T T	A A
430	C C	T T	A A
433	C C	T T	A A
434	C C	T T	A A
439	C C	T T	A A
441	C C	T T	A A
442	C C	T T	A A
444	C C	T T	A A
445	C C	T T	A A
446	C C	T T	A A
449	C C	T T	A A
450	C C	T T	A A
453	C C	T T	A A
454	C C	T T	A A
455	C C	T T	A A
456	C C	T T	A A
458	C C	T T	A A
459	C C	T T	A A
464	C C	T T	A A
467	C C	T T	A A
470	C C	T T	A A
471	C C	T T	A A
473	C C	T T	A A
474	C C	T T	A A
475	C C	T T	A A
479	C C	T T	A A
480	C C	T T	A A
501	C C	T T	A A
502	C C	T T	A A
504	C C	T T	A A
509	C C	T T	A A
510	C C	T T	A A
511	C C	T T	A A
512	C C	T T	A A
513	C C	T T	A A
516	C C	T T	A A
517	C C	T T	A A
521	C C	T T	A A
522	C C	T T	A A
523	C C	T T	A A
525	C C	T T	A A
527	C C	T T	A A
528	C C	T T	A A
529	C C	T T	A A
530	C C	T T	A A
533	C C	T T	A A
534	C C	T T	A A
536	C C	T T	A A
537	C C	T T	A A
538	C C	T T	A A
543	C C	T T	A A
548	C C	T T	A A
549	C C	T T	A A
552	C C	T T	A A
553	C C	T T	A A
558	C C	T T	A A
560	C C	T T	A A
561	C C	T T	A A
563	C C	T T	A A
564	C C	T T	A A
566	C C	T T	A A
567	C C	T T	A A
568	C C	T T	A A
570	C C	T T	A A
572	C C	T T	A A
573	C C	T T	A A
574	C C	T T	A A
582	C C	T T	A A
583	C C	T T	A A
588	C C	T T	A A
589	C C	T T	A A
590	C C	T T	A A
591	C C	T T	A A
594	C C	T T	A A
597	C C	T T	A A
598	C C	T T	A A
600	C C	T T	A A
601	C C	T T	A A
606	C C	T T	A A
607	C C	T T	A A
608	C C	T T	A A
611	C C	T T	A A
612	C C	T T	A A
613	C C	T T	A A
615	C C	T T	A A
618	C C	T T	A A
619	C C	T T	A A
621	C C	T T	A A
622	C C	T T	A A
624	C C	T T	A A
625	C C	T T	A A
628	C C	T T	A A
635	C C	T T	A A
639	C C	T T	A A
641	C C	T T	A A
642	C C	T T	A A
643	C C	T T	A A
644	C C	T T	A A
647	C C	T T	A A
648	C C	T T	A A
651	C C	T T	A A
653	C C	T T	A A
654	C C	T T	A A
655	C C	T T	A A
656	C C	T T	A A
659	C C	T T	A A
660	C C	T T	A A
663	C C	T T	A A
664	C C	T T	A A
665	C C	T T	A A
667	C C	T T	A A
668	C C	T T	A A
669	C C	T T	A A
671	C C	T T	A A
678	C C	T T	A A
679	C C	T T	A A
680	C C	T T	A A
681	C C	T T	A A
682	C C	T T	A A
683	C C	T T	A A
684	C C	T T	A A
685	C C	T T	A A
686	C C	T T	A A
690	C C	T T	A A
691	C C	T T	A A
700	C C	T T	A A
701	C C	T T	A A
702	C C	T T	A A
703	C C	T T	A A
704	C C	T T	A A
709	C C	T T	A A
712	C C	T T	A A
713	C C	T T	A A
718	C C	T T	A A
719	C C	T T	A A
721	C C	T T	A A
726	C C	T T	A A
729	C C	T T	A A
732	C C	T T	A A
733	C C	T T	A A
737	C C	T T	A A
740	C C	T T	A A
741	C C	T T	A A
742	C C	T T	A A
744	C C	T T	A A
746	C C	T T	A A
751	C C	T T	A A
754	C C	T T	A A
755	C C	T T	A A
757	C C	T T	A A
758	C C	T T	A A
762	C C	T T	A A
767	C C	T T	A A
769	C C	T T	A A
770	C C	T T	A A
771	C C	T T	A A
772	C C	T T	A A
774	C C	T T	A A
775	C C	T T	A A
778	C C	T T	A A
780	C C	T T	A A
783	C C	T T	A A
784	C C	T T	A A
785	C C	T T	A A
787	C C	T T	A A
788	C C	T T	A A
789	C C	T T	A A
790	C C	T T	A A
795	C C	T T	A A
797	C C	T T	A A
800	C C	T T	A A
804	C C	T T	A A
805	C C	T T	A A
807	C C	T T	A A
808	C C	T T	A A
811	C C	T T	A A
812	C C	T T	A A
813	C C	T T	A A
816	C C	T T	A A
818	C C	T T	A A
819	C C	T T	A A
820	C C	T T	A A
822	C C	T T	A A
824	C C	T T	A A
827	C C	T T	A A
828	C C	T T	A A
829	C C	T T	A A
832	C C	T T	A A
834	C C	T T	A A
835	C C	T T	A A
837	C C	T T	A A
838	C C	T T	A A
847	C C	T T	A A
849	C C	T T	A A
850	C C	T T	A A
852	C C	T T	A A
853	C C	T T	A A
854	C C	T T	A A
855	C C	T T	A A
857	C C	T T	A A
858	C C	T T	A A
859	C C	T T	A A
860	C C	T T	A A
48	C T	G T	A G
61	C T	G T	A G
96	C T	G T	A G
132	C T	G T	A G
140	C T	G T	A G
149	C T	G T	A G
159	C T	G T	A G
169	C T	G T	A G
175	C T	G T	A G
209	C T	G T	A G
210	C T	G T	A G
228	C T	G T	A G
257	C T	G T	A G
265	C T	G T	A G
269	C T	G T	A G
280	C T	G T	A G
283	C T	G T	A G
293	C T	G T	A G
297	C T	G T	A G
333	C T	G T	A G
368	C T	G T	A G
372	C T	G T	A G
381	C T	G T	A G
396	C T	G T	A G
415	C T	G T	A G
431	C T	G T	A G
436	C T	G T	A G
437	C T	G T	A G
443	C T	G T	A G
457	C T	G T	A G
466	C T	G T	A G
472	C T	G T	A G
478	C T	G T	A G
554	C T	G T	A G
557	C T	G T	A G
579	C T	G T	A G
603	C T	G T	A G
638	C T	G T	A G
675	C T	G T	A G
688	C T	G T	A G
707	C T	G T	A G
724	C T	G T	A G
739	C T	G T	A G
764	C T	G T	A G
779	C T	G T	A G
781	C T	G T	A G
802	C T	G T	A G
833	C T	G T	A G
843	C T	G T	A G
179	C C	T T	A G
229	C C	T T	A G
506	C C	T T	A G
20	C T	T T	A G
190	C T	T T	A G
238	C T	T T	A G
575	C T	T T	A G
586	C T	T T	A G
699	C T	T T	A G
435	T T	G G	G G
545	T T	G G	G G
440	C T	G T	G G
54	T T	G T	G G
